# Supplementary material
Source: HighWire-hosted journal article supplement (https://jnm.snmjournals.org/highwire/filestream/94677/field_highwire_adjunct_files/0/142083_Supplemental_Data.pdf)
Supplement: 142083_Supplemental_Data.pdf [file 142083_Supplemental_Data.pdf]

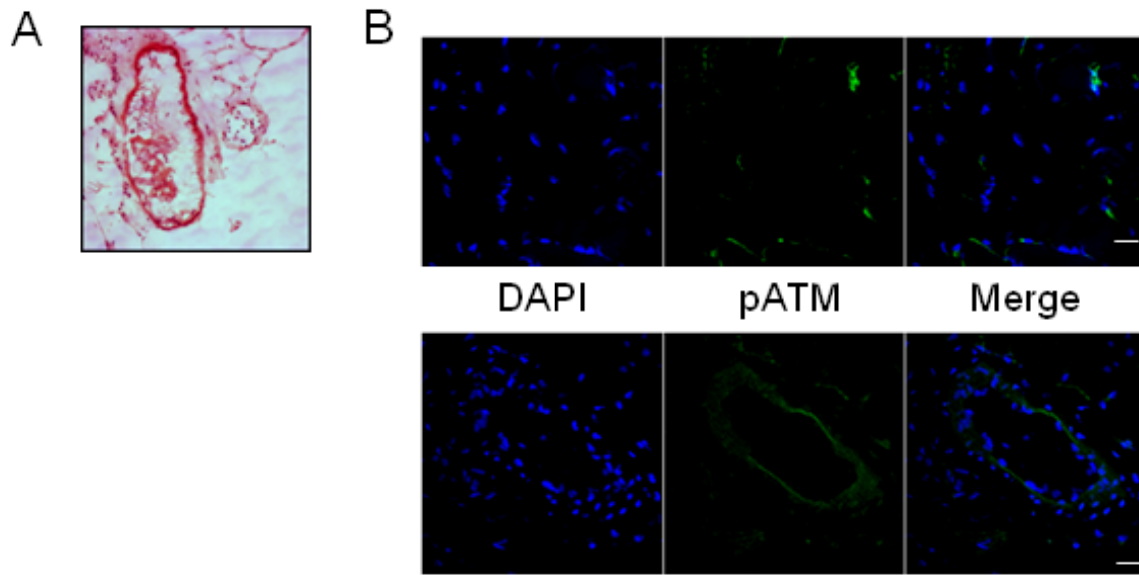

**Supplemental Figure 1:** Mammary fat pads were harvested from WT BALB/c mice aged 130 days. Tissues were frozen, sectioned and (A) stained with haematoxylin/eosin. Ductal structures were normal, with near uniform-sized cells containing small, asymmetric nuclei. (B) Sections immunostained for pATM (scale bar = 50  $\mu\text{m}$ ).

A

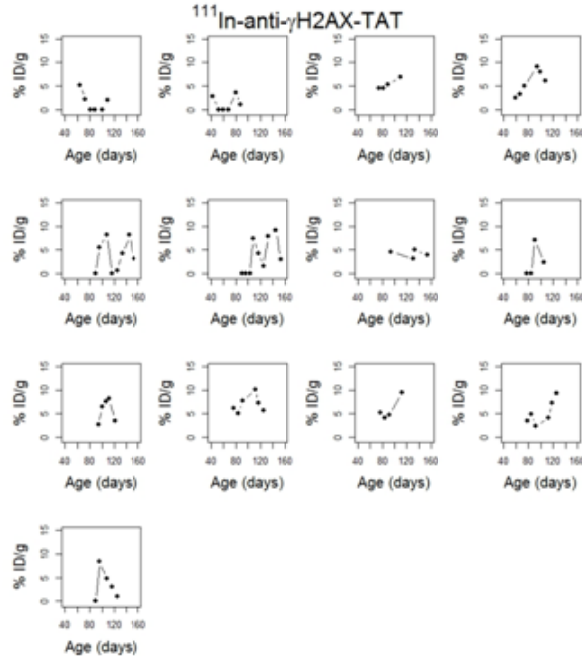

B

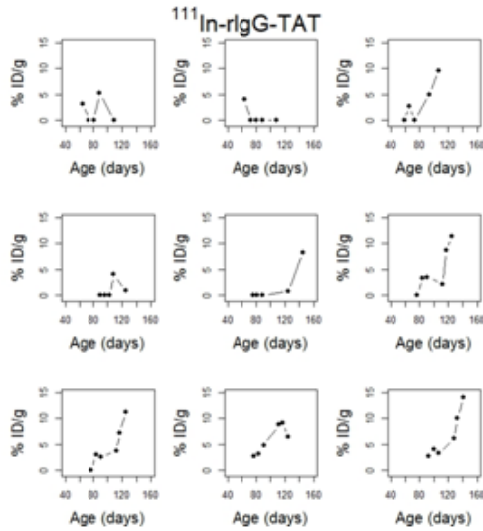

**Supplemental Figure 2:** BALB-neuT mice of different ages received  $^{111}\text{In}$ -anti- $\gamma\text{H2AX}$ -TAT (A) or  $^{111}\text{In}$ -rIgGTAT (B) i.v. at weekly intervals and SPECT images acquired 24 h p.i. The uptake of  $^{111}\text{In}$  in mammary tissue was quantified by VOI analysis. The time course of  $^{111}\text{In}$  uptake in mammary tissue in individual mice is shown.
